# Multimodal Classification of Mild Traumatic Brain Injury Reveals Local Coupling Between Structural and Functional Connectomes

1 Ajay Peddada<sup>1</sup>, Kevin S. Holly<sup>4</sup>, Tejaswi D. Sudhakar<sup>1</sup>, Christina Ledbetter<sup>4</sup>, Christopher E.  
2 Talbot<sup>1</sup>, Daniel Valdivia<sup>1</sup>, Piyush Kalakoti<sup>3</sup>, Elizabeth Ginalis<sup>1</sup>, Travis Quinoa<sup>1</sup>, Benjamin J.  
3 Barker<sup>4</sup>, Derrick Murcia<sup>4</sup>, Rebekah Daggett<sup>4</sup>, Phillip Holly<sup>4</sup>, Tina Phan<sup>4</sup>, Robert C. Ross<sup>4</sup>,  
4 Eduardo Gonzalez-Toledo<sup>4</sup>, Bharat Biswal<sup>2</sup> and Hai Sun<sup>1\*</sup>

5 <sup>1</sup>Department of Neurosurgery, Rutgers Robert Wood Johnson Medical School, New Brunswick, NJ,  
6 USA

7 <sup>2</sup>Department of Biomedical Engineering, New Jersey Institute of Technology, Newark, NJ, USA

8 <sup>3</sup>Bloomberg School of Public Health, Johns Hopkins University, Baltimore, MD, USA

9 <sup>4</sup>Department of Neurosurgery, Louisiana State University Health Shreveport, Shreveport, LA, USA

10 <sup>5</sup>Department of Radiology, Louisiana State University Health Shreveport, Shreveport, LA, USA

11 \* **Correspondence:**

12 Corresponding Author

13 [hs925@rwjms.rutgers.edu](mailto:hs925@rwjms.rutgers.edu)

14 **Keywords: mTBI, functional connectivity, rs-fMRI, structural connectivity, DTI, tractography,**  
15 **multimodal, machine learning, coupling**

16 **Abstract**

17 Background: Following mild traumatic brain injury (mTBI) compromised white matter structural  
18 integrity can result in alterations in functional connectivity of large-scale brain networks and may  
19 manifest in functional deficit including cognitive dysfunction . Advanced magnetic resonance  
20 neuroimaging techniques, specifically diffusion tensor imaging (DTI) and resting state functional  
21 magnetic resonance imaging (rs-fMRI), have demonstrated an increased sensitivity for detecting  
22 microstructural changes associated with mTBI. Identification of novel imaging biomarkers can  
23 facilitate early detection of these changes for effective treatment. In this study, we hypothesize that  
24 feature selection combining both structural and functional connectivity increases classification  
25 accuracy.

26 Methods: 16 subjects with mTBI and 20 healthy controls underwent both DTI and resting state  
27 functional imaging. Structural connectivity matrices were generated from white matter tractography  
28 from DTI sequences. Functional connectivity was measured through pairwise correlations of rs-fMRI  
29 between brain regions. Features from both DTI and rs-fMRI were selected by identifying five brain  
30 regions with the largest group differences and were used to classify the generated functional and  
31 structural connectivity matrices, respectively. Classification was performed using linear support  
32 vector machines and validated with leave-one-out cross validation.

33 Results: Group comparisons revealed increased functional connectivity in the temporal lobe and  
34 cerebellum as well as decreased structural connectivity in the temporal lobe. After training on  
35 structural connections only, a maximum classification accuracy of 78% was achieved when structural  
36 connections were selected based on their corresponding functional connectivity group differences.  
37 After training on functional connections only, a maximum classification accuracy of 69% was  
38 achieved when functional connections were selected based on their structural connectivity group

It is made available under a [CC-BY 4.0 International license](https://creativecommons.org/licenses/by/4.0/).  
**Multimodal Classification of Mild Traumatic Brain Injury Reveals Local Coupling Between Structural and Functional Connectomes**

39 differences. After training on both structural and functional connections, a maximum classification  
40 accuracy of 69% was achieved when connections were selected based on their structural  
41 connectivity.

42 Conclusions: Our multimodal approach to ROI selection achieves at highest, a classification accuracy  
43 of 78%. Our results also implicate the temporal lobe in the pathophysiology of mTBI. Our findings  
44 suggest that white matter tractography can serve as a robust biomarker for mTBI when used in  
45 tandem with resting state functional connectivity.

## 46 **1 Introduction**

47 White matter fiber tracts constitute the structural pathways that interlink distinct brain regions,  
48 forming the anatomical backbone of structural connectivity networks (Wang, 2020). The integrity of  
49 white matter tracts is essential for normal brain function. These structural connectivity networks  
50 support functional interactions between brain areas and thus establish a structure-function  
51 relationship (Craddock et al. 2013). In mild traumatic brain injury (mTBI), traumatic insult to these  
52 structural networks results in axonal injury. As a result, compromised structural integrity can initiate  
53 compensatory changes in structural networks (Andriessen, 2010; Chatelin, 2011). This can cause  
54 collateral alterations in functional connectivity of large-scale brain networks. These aberrant changes  
55 may manifest clinically with symptoms or impairments in cognitive, sensorimotor, or behavioral  
56 function (Harris, Verley, Gutman, Thompson, et al. 2016; Sinke et al. 2021). Therefore, mTBI results  
57 in a complex pattern of network dysfunction (Hayes, Bigler, and Verfaellie 2016; Mckee and  
58 Daneshvar 2015).

59 Advanced neuroimaging techniques have been shown to capture network-level dysfunction in  
60 mTBI. Diffusion tensor imaging (DTI) has demonstrated an increased sensitivity for detecting  
61 microstructural changes, such as DAI (Puig et al. 2020). DTI generates signal contrast when proton  
62 diffusion is anisotropic, appropriate for visualizing a highly organized fiber structure. Random and  
63 isotropic diffusion of protons, reflective of unrestricted water dispersion due to loss of white matter  
64 integrity, results in the loss of signal contrast (Harris, Verley, Gutman, and Sutton 2016; Hayes,  
65 Bigler, and Verfaellie 2016). Furthermore, diffusion tractography has been shown to adequately  
66 quantify structural connectivity. However, literature reports DTI tractography to both underestimate  
67 and overestimate white matter fiber connections by inadequately quantifying weak long-range  
68 connections as well as over quantifying spurious connections, increasing both false-negative and  
69 false-positive results, respectively (Chu, Parhi, and Lenglet 2018; R. E. Smith et al. 2012).

70 Network alterations following mTBI have also been investigated using functional magnetic  
71 resonance imaging (fMRI) and is well reported in the literature (Mayer et al. 2011; Stevens et al.  
72 2012; Palacios et al. 2017; Irajli et al. 2015). Resting state functional magnetic resonance imaging (rs-  
73 fMRI) quantifies blood oxygen levels as a surrogate marker of brain activity, and functional  
74 connectivity measures the temporal correlation between different brain regions in resting state brain  
75 networks (Sharp et al. 2011; Biswal et al. 1995). rs-fMRI analysis of mTBI has characterized  
76 alterations in functional activity potentially due to direct injury of functional networks or remodeling  
77 following traumatic insult (Mayer et al. 2011).

78 Recent studies have shown that multimodal methods combining structural and functional  
79 information, quantified by DTI tractography and rs-fMRI, can better detect compromised network  
80 integrity (Chu, Parhi, and Lenglet 2018). Multiple studies have reported on the relationship between

This is made available under a [CC-BY 4.0 International license](https://creativecommons.org/licenses/by/4.0/).  
**Multimodal Classification of Mild Traumatic Brain Injury Reveals Local Coupling Between Structural and Functional Connectomes**

81 structural and functional connectivity in mild TBI (Harris, Verley, Gutman, and Sutton 2016; Harris,  
82 Verley, Gutman, Thompson, et al. 2016; Irajy et al. 2016a; Tang et al. 2012). A study by Sharp et al.  
83 in 2011 reported decreased functional connectivity in the default mode network (DMN) in mTBI  
84 subjects with decreased structural connectivity (Sharp et al. 2011). Palacios and colleagues reported  
85 an inverse relationship, exhibiting decreased structural connectivity and increased functional  
86 connectivity in regions in the frontal lobe in chronic traumatic brain injury subjects. (Palacios et al.  
87 2013a).

88 The emergence of large, multimodal datasets has enabled the use of multivariate statistical  
89 modeling techniques known as “machine learning” to both predict pathologic conditions as well as  
90 extract potential biomarkers. Machine learning has been used on single imaging modalities such as  
91 DTI tractography (Mitra et al. 2016) has also achieved strong classification performance on larger  
92 datasets combining T1 weighted MRI and other advanced imaging sequences (Lui et al. 2014).  
93 However, not all studies have found success in classification with multimodal imaging data. Vergara  
94 et al found that combining both structural and functional connectivity reduced classification  
95 performance (Vergara et al. 2017).

96 In our study, we quantified changes in functional and structural connectomes between mTBI  
97 and healthy controls. We showed that group differences in functional connectivity can help identify  
98 structural connections predictive of mTBI. To this end, we trained a multivariate machine learning  
99 algorithm to classify subjects with mTBI from healthy controls. We found that feature selection using  
100 multimodal imaging improved classification accuracy. Through this method, we were able to identify  
101 a set of brain regions that are particularly vulnerable to mTBI.

## 102 **2 Methods**

### 103 **2.1 Subjects**

104 A retrospective chart review was conducted to identify patients with mTBI who underwent  
105 neuroimaging at LSUHSC between September 2015 and June 2017. For the control cohort, subjects  
106 with matched acquisition parameters were identified from an in-house normal control database and  
107 utilized for this study. Approval for this study was granted by Louisiana State University Health  
108 Sciences Center (LSUHSC) Institutional Review Board (IRB). Brain images of thirty-three subjects  
109 with mTBI and thirty-four healthy controls were used in the study. After removing subjects whose  
110 scans were affected by artifacts, sixteen subjects with mTBI and twenty control subjects were  
111 included in this analysis. Age and sex of mTBI and control subjects were compared using  
112 independent two-tailed t-tests with the SciPy library in Python (Jones, Oliphant, and Peterson 2001;  
113 Rossum and Drake 1995).

### 114 **2.2 Image Acquisition**

115 In this study, all MRI scans were acquired on a single 1.5 T clinical MR systems (GE Medical  
116 Systems, Milwaukee, WI, USA). The MRI examination included a high resolution, non-contrast  
117 enhanced T1-weighted sequence (TR/TE 9.644/3.82, 90° flip angle, 256 × 256 matrix size, 1.2-mm  
118 slice thickness), diffusion tensor sequence (An optimized TE, 90° flip angle, 256 × 256 matrix size,  
119 field of view 28 cm, 5-mm slice thickness, 1 mm spacing, axial slice orientation, 36 directions, b-  
120 values, 1000; NEX, 1), and EPI-BOLD functional MRI sequence (TR/TE 3,000/60, 64 × 64 matrix  
121 size, 5-mm slice thickness, 5 min 12 sec, 104 whole brain resting state acquisition, where the first 4

It is made available under a [CC-BY 4.0 International license](https://creativecommons.org/licenses/by/4.0/).

## Multimodal Classification of Mild Traumatic Brain Injury Reveals Local Coupling Between Structural and Functional Connectomes

122 were discarded). Retrieved DICOM images for eligible participants were converted to NIFTI format  
123 using MRICron ([www.mccauslandcenter.sc.edu/crnl/mricron/](http://www.mccauslandcenter.sc.edu/crnl/mricron/)).

124 Using 3D Slicer version 4.1.1 (<http://www.slicer.org>), T1 scans were registered to the  
125 baseline DTI volume and saved in the NIFTI (.nii) format (See supplementary material for details)  
126 (Andriy et al. 2012). BrainSuite version 16a1 was used to generate brain masks from T1 sequences  
127 ([www.brainsuite.org](http://www.brainsuite.org)).

128 The brain masks were manually edited within BrainSuite by 4 individuals who checked each  
129 other's work to ensure high quality.

### 130 **2.3 fMRI Preprocessing**

131 Preprocessing of fMRI scans was done using the default pipeline in the CONN-fMRI  
132 Functional Connectivity toolbox, which implements SPM12 (Whitfield-Gabrieli and Nieto-Castanon  
133 2012; Friston 2007). The preprocessing steps were functional realignment and unwarping, slice-  
134 timing correction, outlier identification, direct segmentation and normalization, and functional  
135 smoothing. Data was transformed to the Montreal Neurological Institute standard space at a  
136 resolution of  $2 \times 2 \times 2 \text{ mm}^3$ . Data was smoothed with an 8 mm full width at half maximum (FWHM)  
137 kernel. Images with a framewise displacement above 0.9mm or BOLD signal changes 5 standard  
138 deviations above the global mean were flagged as outliers.

### 139 **2.4 Establishing Nodes for the Connectome**

140 The Harvard-Oxford cortical atlas and AAL subcortical atlas was imported from CONN into  
141 BrainSuite, which contained Brodmann areas from the Talairach Daemon atlas ([www.talairach.org](http://www.talairach.org))  
142 along with four Fox nodes that were brought into MNI-space through a Lancaster transform  
143 (Whitfield-Gabrieli and Nieto-Castanon 2012). In CONN, the global signal was regressed. This atlas  
144 defined 132 regions of interests (ROIs), i.e., nodes. MNI coordinates for all nodes are listed in Table  
145 S1. These nodes are used to estimate both structural and functional connectivity metrics. From these  
146 structural and functional connectivity metrics, connectivity matrices were then computed among the  
147 nodes.

### 148 **2.5 Computing Functional Connectivity Matrix from rs-fMRI**

149 T1 weighted and rs-fMRI sequences were preprocessed within the open-source software  
150 package, CONN, using Statistical Parametric Mapping software (SPM12, Wellcome Department of  
151 Imaging Neuroscience, Institute of Neurology and the National Hospital for Neurology and  
152 Neurosurgery; London, England). As shown in Figure 1, CONN was utilized to analyze FC based on  
153 the rs-fMRI sequences within nodes that were segmented based on the high-resolution T1 anatomical  
154 image (Whitfield-Gabrieli and Nieto-Castanon 2012). The FC strength between nodes was  
155 determined by a Fischer transform correlation coefficient within CONN, which measures the  
156 correlation of BOLD signals between the two nodes. Connectivity matrices containing these  
157 correlation coefficients for each node-to-node were exported from CONN.

## Multimodal Classification of Mild Traumatic Brain Injury Reveals Local Coupling Between Structural and Functional Connectomes

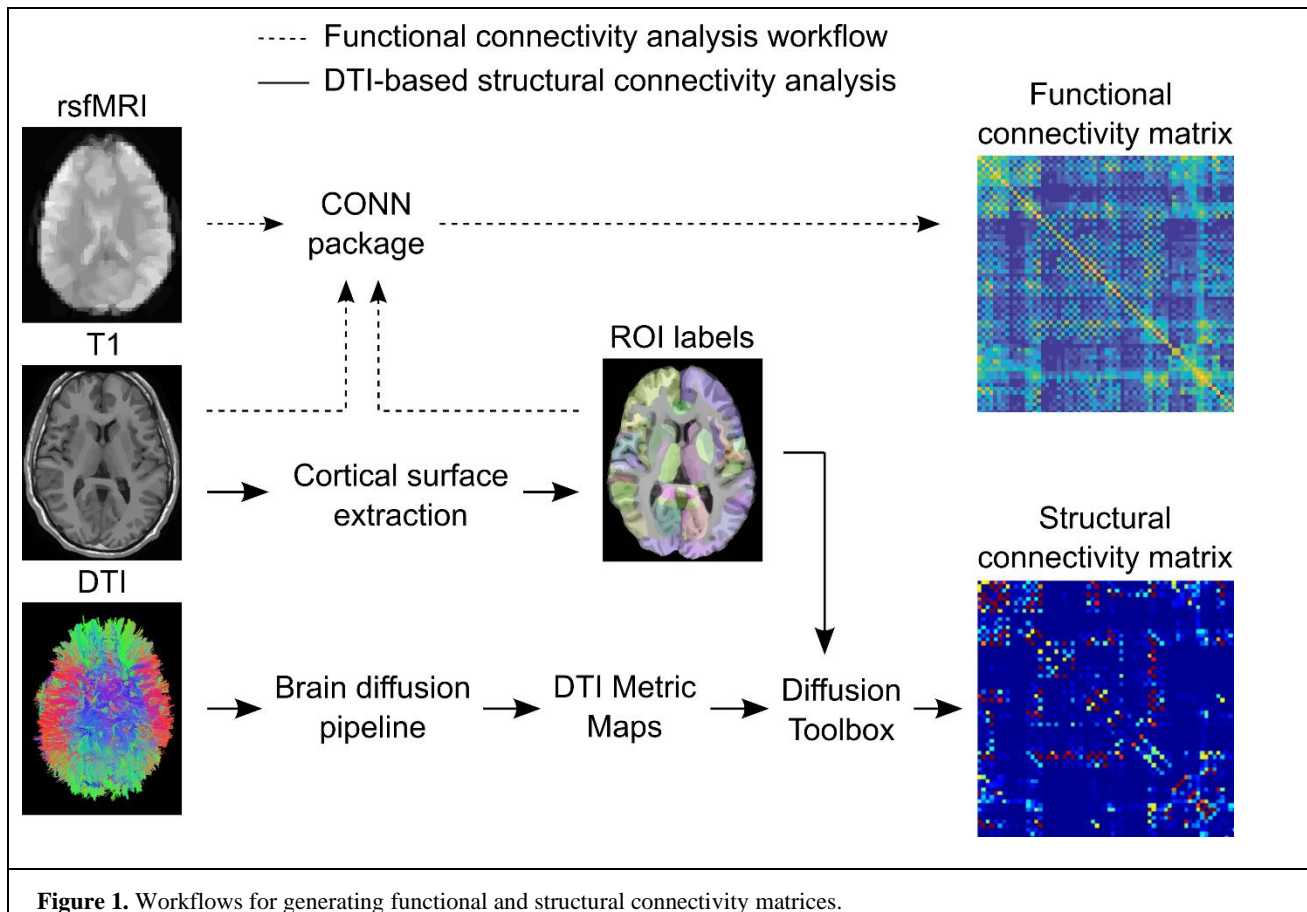

**Figure 1.** Workflows for generating functional and structural connectivity matrices.

### 158 2.6 Preprocessing DTI

159 Voxel-wise statistical analysis of the fractional anisotropy (FA) data was carried out using  
160 TBSS (Tract-Based Spatial Statistics, (S. M. Smith et al. 2006)), part of FSL (S. M. Smith et al.  
161 2004). First, FA images were created by fitting a tensor model to the raw diffusion data using FDT,  
162 and then brain-extracted using BET (Smith 2002). FA data extracted from every DTI sequence from  
163 our cohort were then aligned into a common space using the nonlinear registration tool FNIRT  
164 (Andersson 2007a; Andersson 2007b), which uses a b-spline representation of the registration warp  
165 field (Rueckert et al. 1999). Next, the mean FA image was created and thinned to create a mean FA  
166 skeleton which represents the centers of all tracts common to the group. Each subject's aligned FA  
167 data was then projected onto this skeleton and the resulting data fed into voxel-wise cross-subject  
168 statistics.

### 169 2.7 Computing Structural Connectivity from DTI

170 T1-weighted anatomical images were semi-automatically skull-stripped with BrainSuite's  
171 Brain Extraction Sequence and automatically co-registered to the CONN atlas with BrainSuite's  
172 surface volume registration (Shattuck and Leahy 2002). Using the BrainSuite Diffusion Pipeline, FA  
173 maps were derived from the DTI images and were co-registered with the T1-weighted anatomical  
174 image for each subject. Using BrainSuite's diffusion toolbox, SC between the 132 ROIs was found  
175 based upon the DTI deterministic local tractography with a step-size of 0.25 mm using angular and  
176 FA thresholds of 35 degrees and 0.2, respectively (Hu et al. 2012; Ni et al. 2011; Min et al. 2014).  
177 The maximum number of steps was 500. The FA threshold ensures the tractography is based on

## Multimodal Classification of Mild Traumatic Brain Injury Reveals Local Coupling Between Structural and Functional Connectomes

178 white matter tracts which have high FA values as opposed to gray matter. The stop angle prevents the  
179 generation of fiber tracts that have a bend less than 35 degrees between any two consecutive points.  
180 The strength for a given structural connection was denoted by the number of fiber tracts that connects  
181 a particular node to another. Connectivity matrices containing the number of fiber tracts between  
182 each node-to-node connection were exported from BrainSuite (Shattuck et al. 2013).

### 183 2.8 Network Connectivity Group Comparison

184 In order to compare differences in structural and functional connectivity between mTBI and  
185 HC, we performed unthresholded independent two-sample t-tests on the connectivity matrices  
186 between mTBI and control groups using the SciPy python library (Jones, Oliphant, and Peterson  
187 2001). In section 3.2, we show the t-scores from the comparison between mTBI and HC of each  
188 connection in both functional and structural connectomes. When performing feature selection for  
189 machine learning analysis, we employed the same method to compare groups but only compared  
190 subjects within a given training fold (see section 2.8).

### 191 2.9 Machine Learning Classification

192 In order to differentiate between mTBI and HC brain networks, we employed linear Support  
193 Vector Machine (SVM) models trained on the connectivity matrices from groups. We validated our  
194 model using a leave-one-out cross-validation (LOOCV) approach, where we repeatedly trained the  
195 SVM on all but one held-out subject. The predictions of the held-out subject data were then  
196 concatenated and compared to the true class labels. In order to maximize classification performance,  
197 we used statistical group comparisons to select a subset of network connections for classification  
198 within each cross-validation training fold. The entire analysis was repeated 20 times in order to verify  
199 the stability of predictions. All analysis was written in Python using the Sci-Kit Learn library  
200 (Rossum and Drake 1995; Pedregosa et al. 2011).

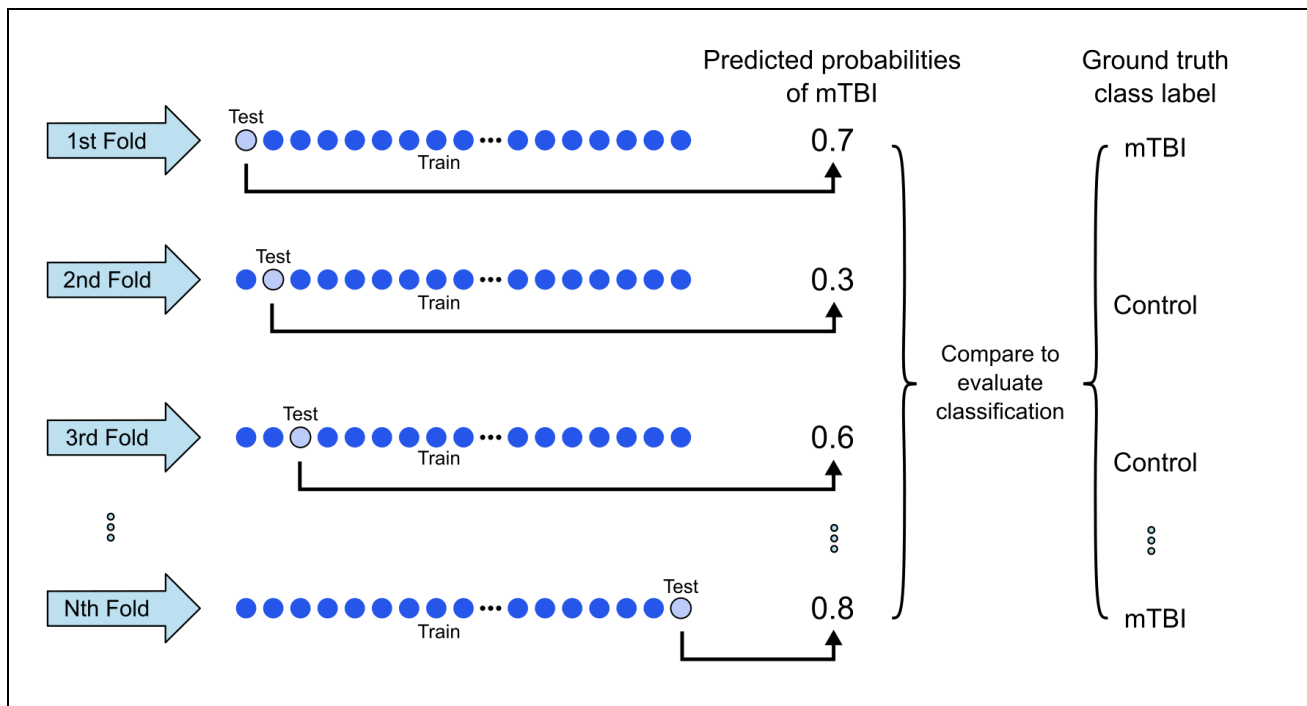

**Figure 2:** Leave-one-out cross validation procedure (LOOCV). Every test split (or “fold”) contains a single subject. The support vector machine (SVM) classifier is trained on all other subjects, and then the classifier predicts the probability of mTBI for the

## Multimodal Classification of Mild Traumatic Brain Injury Reveals Local Coupling Between Structural and Functional Connectomes

single held-out test sample. The data is repeatedly split so that every subject is used as a held-out test sample. Once the probability of mTBI has been predicted for all test samples, a probability threshold is selected such that test samples with predicted probabilities above the threshold are classified as mTBI and those with probabilities below the threshold are classified as HC. These classifications are compared to the ground truth class labels for each test sample, and the probability threshold is adjusted such that classification accuracy is maximized and sensitivity is non-zero. Figure adapted from (Shalhaf et al. 2020).

### 201 2.10 Selecting Network Connections for Classification

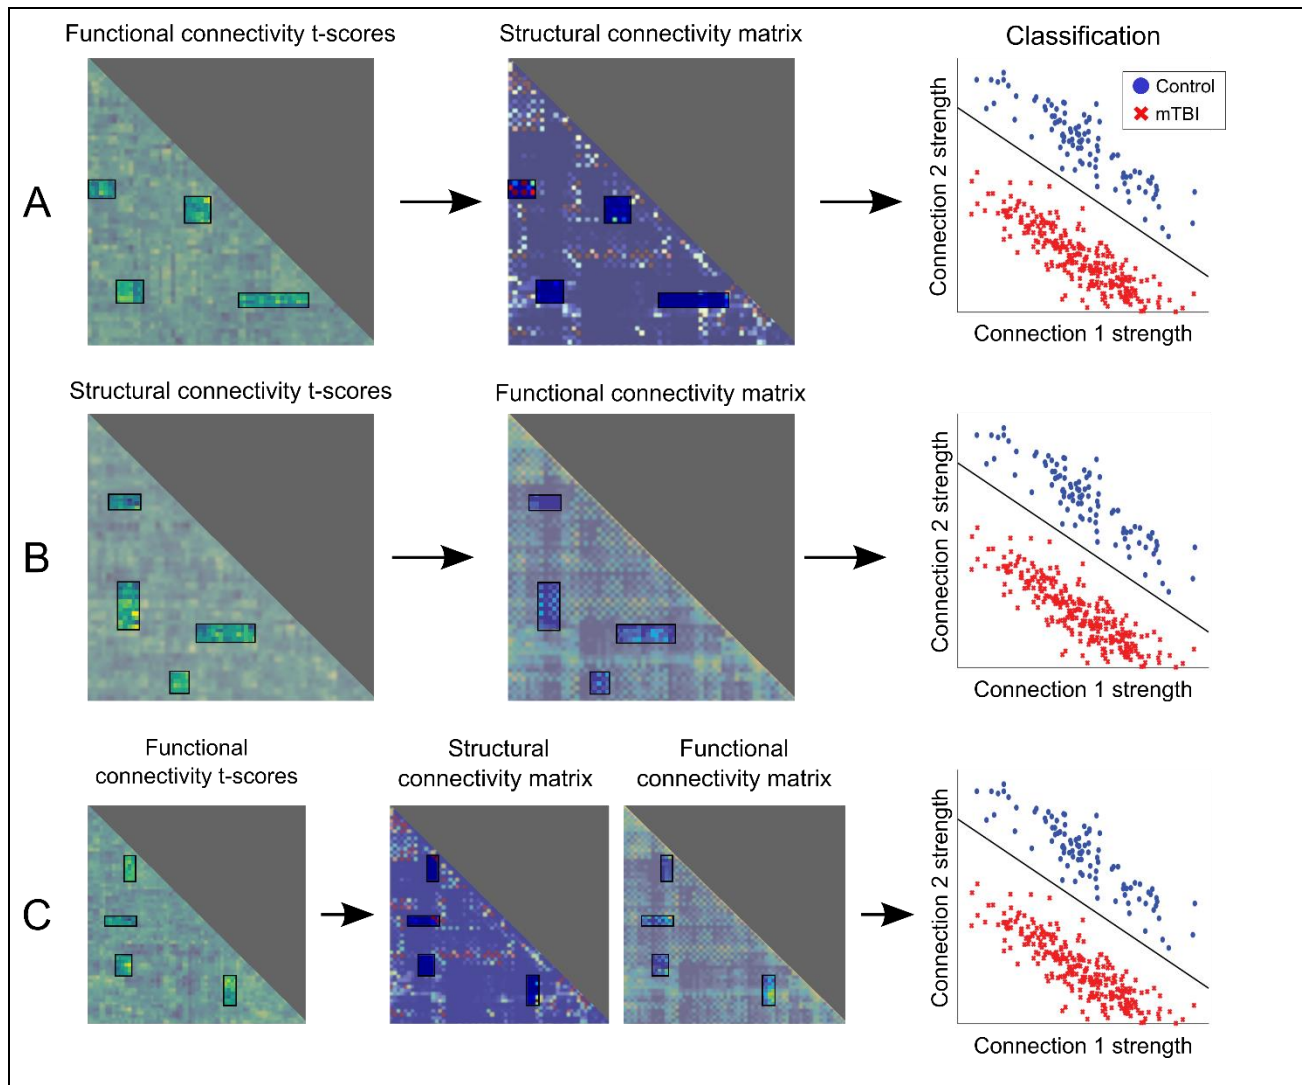

**Figure 3:** Here we depict our feature selection method for classification. Within each training fold, we performed group comparisons on either functional or structural connectivity matrices. We then identified the connections with the highest t-scores. Next, we selected those connections from either the structural or functional connectivity matrices—or both matrices—for classification. For example, in A, we performed a group comparison of functional connectivity matrices between mTBI and Control subjects, identified the functional connections with the highest t-scores, and then trained an SVM classifier on those respective structural connections to discriminate between mTBI and Control subjects. Artificially generated data is shown in the classification figures to demonstrate our methodology.

202 As shown in Figure 3, we first separately performed t-tests on structural and functional  
203 connectivity matrices between each group for all samples within a given training data set. We then  
204 measured the t-score of the group difference for each network connection. Next, we separately

It is made available under a [CC-BY 4.0 International license](https://creativecommons.org/licenses/by/4.0/).  
**Multimodal Classification of Mild Traumatic Brain Injury Reveals Local Coupling Between Structural and Functional Connectomes**

205 ranked functional and structural network connections according to their t-score. We then performed  
206 stepwise feature selection on the training data set, measuring the classification performance of the  
207 SVM trained on the network connections with the top N t-scores—where N increased between 1 and  
208 20. When selecting features to classify the single held-out test sample, we selected the N connections  
209 that yielded the highest AUC in the training fold.

210 In total, there were 6 combinations of feature selection methods. They are listed as follows:  
211 (1) perform a t-test on functional connectivity matrices, identify N connections with the highest t-  
212 scores, and select those corresponding functional connections for classification. (2) perform a t-test  
213 on functional connectivity matrices, identify N connections with the highest t-scores, and select those  
214 corresponding structural connections for classification. (3) perform a t-test on functional connectivity  
215 matrices, identify N connections with the highest t-scores, and select those corresponding functional  
216 and structural connections for classification. (4) perform a t-test on structural connectivity matrices,  
217 identify N connections with the highest t-scores, and select those corresponding functional  
218 connections for classification. (5) perform a t-test on structural connectivity matrices, identify N  
219 connections with the highest t-scores, and select those corresponding structural connections for  
220 classification. (6) perform a t-test on structural connectivity matrices, identify N connections with the  
221 highest t-scores, and select those corresponding functional and structural connections for  
222 classification.

223 After classification analysis, we identified the 10 connections that were most frequently  
224 selected by the feature selection method that yielded the highest classification accuracy. We counted  
225 the number of times each of the 10 connections were selected. Next, we plotted the connections using  
226 the Nibabel 3.2.1 python package (Gramfort et al. 2014).

## 227 **2.11 Performance Evaluation**

228 For each LOOCV split, we recorded the predicted probability of mTBI for the held-out test  
229 sample. Next, we concatenated the 36 probabilities and used them to generate a ROC curve and  
230 evaluated the AUC. We then identified the optimal probability threshold that yielded the best  
231 accuracy and non-zero sensitivity. Among the predicted probabilities for the 37 test-samples, we  
232 classified probabilities above the selected threshold as “mTBI” and probabilities below this threshold  
233 as “Control”. Next, we compared these classifications to the actual class labels and reported the  
234 accuracy, sensitivity, specificity, and F1-score. After evaluation, we compared the AUC metrics of  
235 the best and second-best performing feature selection methods across repeated instantiations using an  
236 independent two-tailed t-test implemented using the SciPy library (Jones, Oliphant, and Peterson  
237 2001).

## 238 **2.12 DTI Classification**

239 After performing feature selection on the structural and functional connectivity matrices, we  
240 determined the ROIs that participated in the most predictive connections. We then classified FA  
241 voxels within those ROIs. We classified both FA voxels as well as the mean FA values within a  
242 given ROI.

## 243 **3 Results**

### 244 **3.1 Subject Data**



**Multimodal Classification of Mild Traumatic Brain Injury Reveals Local Coupling Between Structural and Functional Connectomes**

| Age (in years)  | Control (n=20) | mTBI (n=16)  | p-value |
|-----------------|----------------|--------------|---------|
| Mean ± SD       | 26.5 ± 4.15    | 43.65 ± 8.37 | < 0.001 |
| 95% CI for Mean | 24.51–28.50    | 39.21–48.08  |         |
| Median (IQR)    | 26.0 (4.5)     | 46.0 (12.0)  |         |
|                 |                |              |         |
| Sex, n(%)       |                |              | 0.88    |
| Male            | 12 (60.0%)     | 10 (62.5%)   |         |
| Female          | 8 (40.0%)      | 6 (37.5%)    |         |

245 Sixty-seven adult subjects (>18 years of age) each had MR exams acquired at our institution with the  
 246 same acquisition protocol (Table 1). The MR acquisition protocol included rs-fMRI, DTI, and high-  
 247 resolution non-contrast T1 anatomical image. Subjects whose ages were greater than 2.5 standard  
 248 deviations from the mean group age or whose images were distorted by motion artifacts were  
 249 excluded from our analysis. Twenty healthy subjects from our control database served as the control  
 250 group and sixteen subjects with mTBI formed the pathological group. Demographics collected on  
 251 eligible subjects included age and gender. The control group’s age was  $26.5 \pm 4.15$  years (range: 22-  
 252 40 years) and included 12 males and 8 females. The mTBI group’s age was  $43.65 \pm 8.37$  years  
 253 (range: 27-61 years) and included 10 male and 6 females. Statistical comparisons revealed that the  
 254 mTBI and control groups differed in age ( $p < 0.001$ ) but not in sex ( $p = 0.88$ ).

255 **3.2 Structural and Functional Connectivity Group Comparisons**

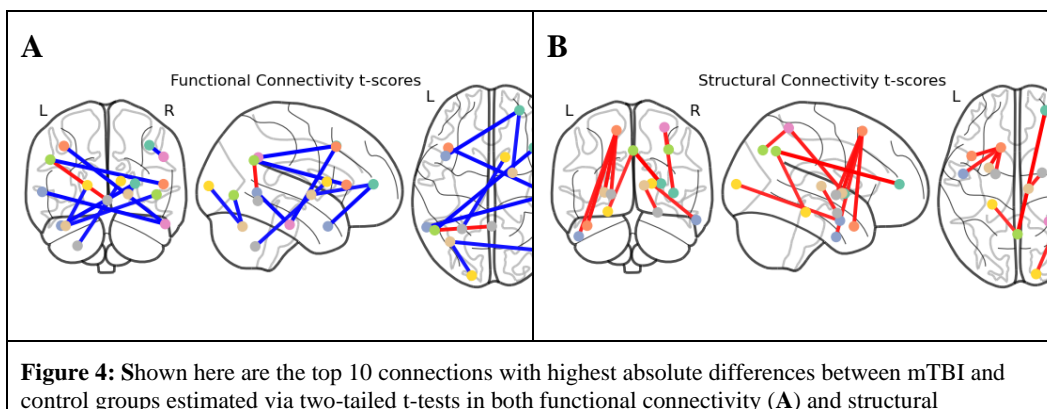

It is made available under a [CC-BY 4.0 International license](https://creativecommons.org/licenses/by/4.0/).  
**Multimodal Classification of Mild Traumatic Brain Injury Reveals Local Coupling Between Structural and Functional Connectomes**

|                                                                                                                                                   |                                                    |                |
|---------------------------------------------------------------------------------------------------------------------------------------------------|----------------------------------------------------|----------------|
| connectivity ( <b>B</b> ). In each subplot, the identified connections were viewed in coronal, sagittal and axial projections from left to right. |                                                    |                |
| <b>Table 2: Connections with 10 highest t-scores</b>                                                                                              |                                                    |                |
| <b><u>Top Functional Connections</u></b>                                                                                                          |                                                    |                |
| <b>ROI</b>                                                                                                                                        | <b>ROI</b>                                         | <b>t-score</b> |
| Middle Frontal Gyrus Right                                                                                                                        | Angular Gyrus Right                                | 4.05           |
| Temporal Pole Left                                                                                                                                | Frontal Pole Right                                 | - 4.01         |
| Angular Gyrus Left                                                                                                                                | Inferior Frontal Gyrus, pars triangularis Right    | - 4.02         |
| Inferior Temporal Gyrus, posterior division Righ'                                                                                                 | Middle Temporal Gyrus, temporooccipital part Left' | - 4.04         |
| Inferior Temporal Gyrus, posterior division Right                                                                                                 | Middle Frontal Gyrus Left                          | - 4.09         |
| Lateral Occipital Cortex, inferior division Righ'                                                                                                 | Cerebellum Crus1 Left                              | - 4.25         |
| Angular Gyrus Left                                                                                                                                | Vermis 4 5                                         | - 4.29         |
| Caudate Right                                                                                                                                     | Cerebellum 8 Left                                  | -4.3           |
| Pallidum Right                                                                                                                                    | Frontal Pole Right                                 | - 4.31         |
| Occipital Pole Left                                                                                                                               | Cerebellum Crus1 Left                              | - 4.38         |

**Multimodal Classification of Mild Traumatic Brain Injury Reveals Local Coupling Between Structural and Functional Connectomes**

| <b><u>Top Structural Connections</u></b>           |                                                  |                |
|----------------------------------------------------|--------------------------------------------------|----------------|
| <b>ROI</b>                                         | <b>ROI</b>                                       | <b>t-score</b> |
| Superior Frontal Gyrus Left                        | Putamen Left                                     | 5.11           |
| Amygdala Right                                     | Thalamus Right                                   | 4.76           |
| Pallidum Left                                      | Superior Frontal Gyrus Left                      | 4.6            |
| Superior Parietal Lobule Right                     | Insular Cortex Right                             | 4.52           |
| Parahippocampal Gyrus, posterior division Left     | Precuneous Cortex                                | 4.46           |
| Occipital Pole Right                               | Middle Temporal Gyrus, anterior division Right   | 4.45           |
| Lingual Gyrus Left                                 | Lateral Occipital Cortex, inferior division Left | 4.25           |
| Lateral Occipital Cortex, superioir division Right | Superior Parietal Lobule Right                   | 4.24           |
| Temporal Pole Left                                 | Superior Frontal Gyrus Left                      | 4.2            |
| Cingulate Gyrus, posterior division                | Frontal Medial Cortex                            | 4.19           |

## Multimodal Classification of Mild Traumatic Brain Injury Reveals Local Coupling Between Structural and Functional Connectomes

256 Before performing machine learning analysis, we compared the functional and structural  
 257 connectomes of subjects with mTBI to healthy controls to find connections that differed between the  
 258 two groups.

259 Nine of the ten functional connections with the highest magnitude t-scores were decreased in  
 260 connectivity in mTBI compared to control. These connections existed between areas in the frontal  
 261 lobe, temporal lobe, and cerebellum (Table 2). In contrast, all ten structural connections with the  
 262 highest t-scores were increased in connectivity in mTBI compared to control and existed between  
 263 areas in the frontal and temporal lobes (Table 2).

### 264 3.3 Functional differences indicate structural alterations in mild TBI

**Table 3: Performance metrics of different feature selection methods**

| Feature selection connectome | Functional |            |                         | Structural |            |                         |
|------------------------------|------------|------------|-------------------------|------------|------------|-------------------------|
|                              | Structural | Functional | Functional & Structural | Structural | Functional | Functional & Structural |
| Classification connectome    |            |            |                         |            |            |                         |
| Area Under ROC Curve (AUC)   | 0.74       | 0.59       | 0.62                    | 0.33       | 0.64       | 0.46                    |
| Accuracy                     | 0.78       | 0.64       | 0.69                    | 0.56       | 0.69       | 0.61                    |
| F1                           | 0.74       | 0.65       | 0.65                    | 0.12       | 0.70       | 0.44                    |
| Sensitivity                  | 0.69       | 0.69       | 0.69                    | 0.06       | 0.75       | 0.38                    |
| Specificity                  | 0.8        | 0.65       | 0.75                    | 0.95       | 0.7        | 0.8                     |

265

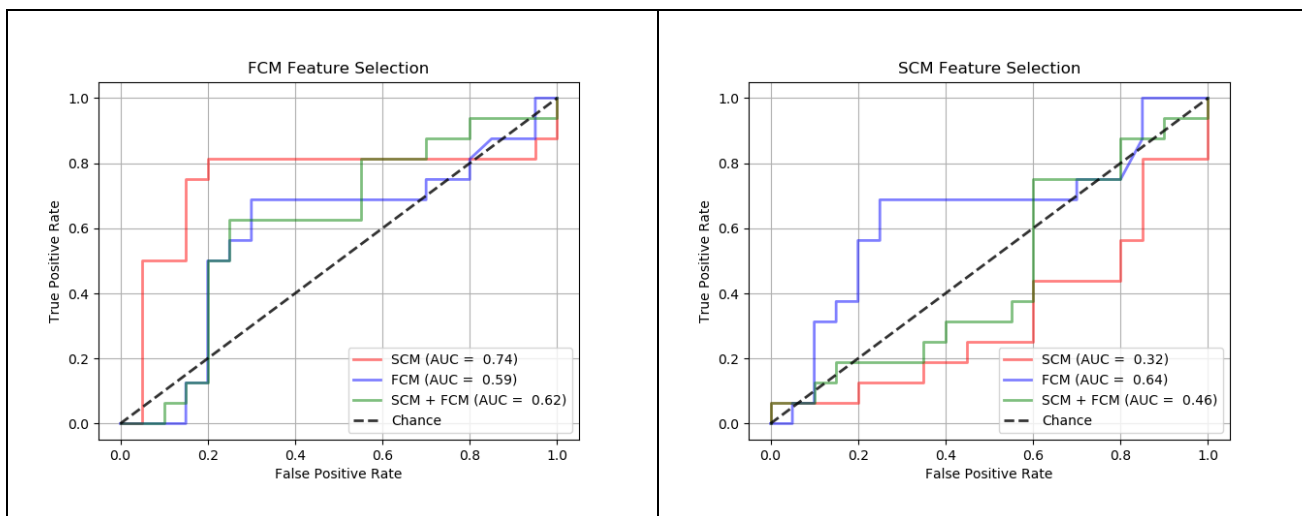

## Multimodal Classification of Mild Traumatic Brain Injury Reveals Local Coupling Between Structural and Functional Connectomes

**Figure 5:** Here, we show the ROC curves for SVM classifiers trained according to the six different feature selection methods. We found that classifying the structural connections whose respective functional connections were the most different between mTBI and control yielded the highest classification performance.

266  
267  
268  
269  
270  
271  
272  
273  
274  
275  
276  
277  
278  
279  
280  
281  
282  
283  
284  
285

Next, we sought to determine which subset of structural and/or functional connections are most predictive of mild TBI. To this end, we trained separate linear support vector machines on subsets of structural and functional connections and determined the model's performance. We selected subsets of connections based on the functional and structural connectivity group comparisons between mTBI and control subjects. Within each training-set, we identified connections with the highest t-score for each modality (fMRI and DTI), and then classified using the connectivity values of these connections for each imaging modality separately as well as together.

When classifying with structural connections (Figure 5), we found classification performance was highest when structural connections were selected according to the functional connectivity group comparison (Table 3). Classification performance decreased when classifying functional connections selected according to the functional connectivity group comparison. Classifying both structural and functional connections that were selected according to the functional group comparison yielded a similar classification performance as when classifying functional connections alone.

Conversely, we found that classification performance was higher when classifying functional connections compared to classifying structural connections identified from the structural connectivity group comparison (Table 3). Classifying both structural and functional connections yielded a similar performance as when classifying with functional connectivity alone.

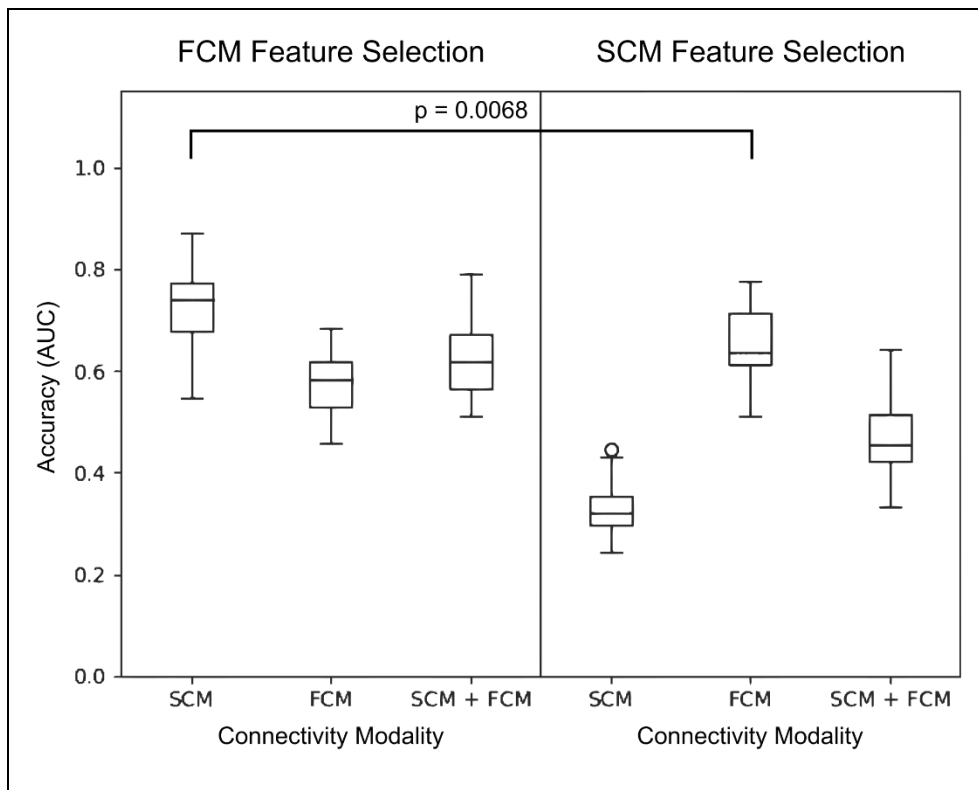

**Figure 6:** Shown are distributions of AUC accuracy values for SVM classifiers trained according to each of the six feature selection methods. In order to determine whether the differences in classification performance across the feature selection methods were due to random initializations of the SVM classifier, we repeated the entire training process 20 times. We found that selecting

Multimodal Classification of Mild Traumatic Brain Injury Reveals Local Coupling Between Structural and Functional Connectomes

structural connections for classification based on the FCM group comparison yielded the highest classification accuracy measured by area under the ROC curve (AUC).

\* - statistical comparison where  $p < 0.05$ .

286

287

288

289

290

291

292

293

294

In order to determine if the differences in classification accuracy imparted by each feature selection method were stable across different random SVM initializations, we repeated each classification strategy 20 times. In Figure 3, we show the distribution of classification accuracies measured by AUC. Our results suggest that classifying structural connections selected by functional connectivity group differences consistently resulted in a higher classification accuracy. In comparison to the second-best performing feature selection method, classification of structural connections selected by functional connectivity group differences yielded a significantly higher AUC ( $p < 0.05$ ).

295

**3.4 Mild TBI results in altered connectivity in the frontal and temporal lobes and cerebellum**

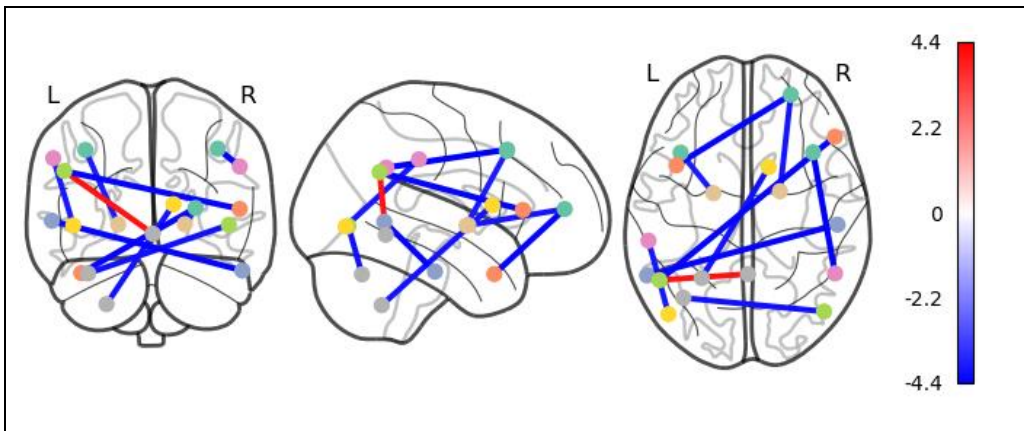

**Figure 7:** Here, we plotted the functional connectivity t-scores of the top 10 most frequently selected connections for classification. Discriminative connections were primarily between areas in the frontal lobe, temporal lobe, and cerebellum. In each subplot, the identified connections were viewed in coronal, sagittal and axial projections from left to right.

296

| Table 3: T-scores of most predictive functional connections identified by classification |                                                   |         |
|------------------------------------------------------------------------------------------|---------------------------------------------------|---------|
| ROI                                                                                      |                                                   |         |
|                                                                                          | ROI                                               | t-score |
| Middle Frontal Gyrus Right                                                               |                                                   |         |
| Inferior Temporal Gyrus, posterior division Right                                        | Angular Gyrus Right                               | 4.05    |
| Lateral Occipital Cortex, inferior division Right                                        | Middle Temporal Gyrus, temporooccipital part Left | -4.01   |

**Multimodal Classification of Mild Traumatic Brain Injury Reveals Local Coupling Between Structural and Functional Connectomes**

|                                             |                                                  |           |
|---------------------------------------------|--------------------------------------------------|-----------|
| Angular Gyrus Left                          | Cerebellum Crus1 Left                            | -<br>4.02 |
| Angular Gyrus Left                          | Vermis 4 5                                       | -<br>4.04 |
| Pallidum Right                              | Inferior Frontal Gyrus, pars triangularis Right  | -<br>4.09 |
| Caudate Right                               | Frontal Pole Right                               | -<br>4.25 |
| Middle Frontal Gyrus Left                   | Cerebellum 8 Left                                | -<br>4.29 |
| Supramarginal Gyrus, anterior division Left | Pallidum Left                                    | -4.3      |
| 'Temporal Pole Left'                        | Lateral Occipital Cortex, inferior division Left | -<br>4.31 |

297 During classification, we counted the number of times each connection was selected for  
 298 classification during our stepwise feature selection procedure. Next, we plotted the top 10 most  
 299 frequently selected connections. Many of the ROIs that participated in these top-10 connections were  
 300 in the frontal and temporal lobes. Additionally, ROIs were in the Angular Gyrus, Supplementary  
 301 Motor Cortex, and Cerebellum (Table 2).

302 **3.5 FA Classification**

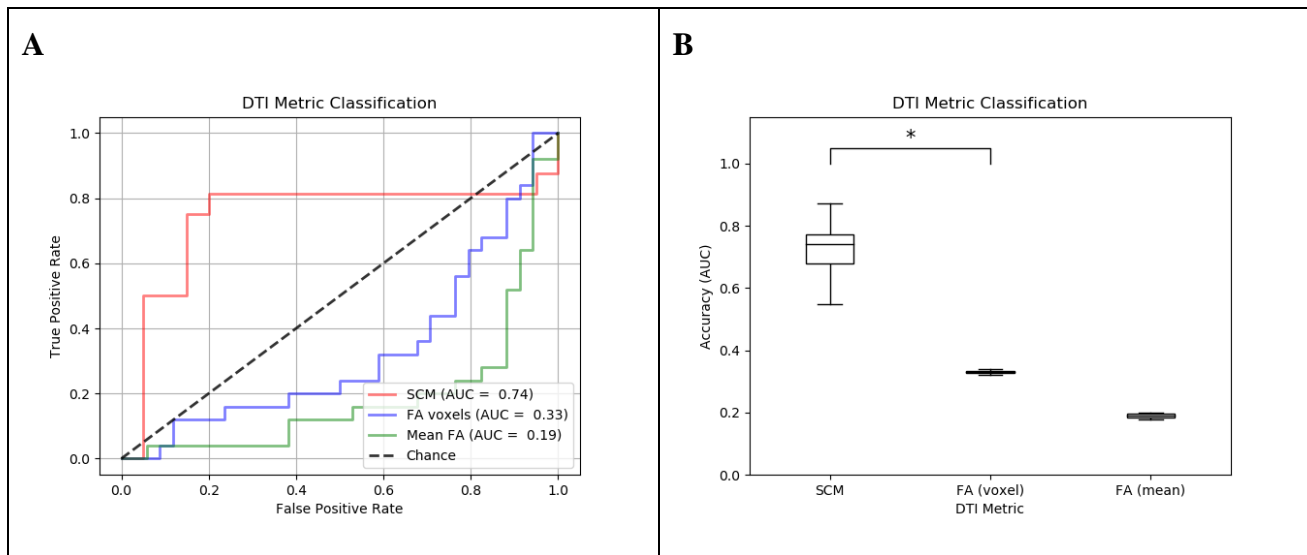

**Figure 8:** Here, we show the ROC curves and AUC accuracy metrics for SVM classifiers trained according to the best of the six feature selection methods as well as FA voxels and mean FA values. We determined whether structural connections, which are measured by diffusion tractography, are more predictive of mTBI than FA voxels or mean FA values within a given ROI. We created masks of the ROIs participating in the top 5 most frequently selected structural connections for classification (Table 3) and masked the FA data for all subjects. We compared the classification accuracy of the best performing feature selection method

It is made available under a [CC-BY 4.0 International license](https://creativecommons.org/licenses/by/4.0/).  
**Multimodal Classification of Mild Traumatic Brain Injury Reveals Local Coupling Between Structural and Functional Connectomes**

(classifying SCM selected according to FCM group comparison) to SVMs trained on all FA voxels in the selected ROIs as well as the average FA values of each ROI. In **A**, we show the ROC curves generated by the trained SVM classifiers, and in **B** we show the AUC performance metric measured across 20 different random initializations of SVM classifiers. We found that classifying an optimal subset of structural brain connections measured by diffusion tractography resulted in substantially better performance than classifying diffusion metrics.

\* - statistical comparison where  $p < 0.001$ .

303

304 We also compared classification performance of an SVM built on FA voxels and average FA  
305 values within the ROIs of the top 5 most frequently selected brain connections for SCM classification  
306 (Table 3). First, we performed an independent 2-tailed t-test of FA values between mTBI and  
307 controls and found no significant differences. Next, we found that classifying on FA values  
308 consistently yielded poor classification performance (Figure 8), which suggests that differences in  
309 brain structure after mTBI are more easily identified with large-scale measures such as tractography.  
310 In comparison to directly classifying FA voxels, classification of structural connections selected by  
311 functional connectivity group differences yielded a significantly higher AUC ( $p < 0.001$ ).

## 312 **4 Discussion**

313 In this study, we applied a machine learning algorithm to classify subjects with mTBI from  
314 healthy controls using multimodal neuroimaging sequences and identified structural and functional  
315 networks that are altered in mTBI. Results from our functional connectivity analysis revealed a  
316 widespread hyperconnectivity and localized hypoconnectivity within the inferior temporal gyrus,  
317 brain stem, and cerebellum in mTBI subjects compared to healthy controls. Analysis of structural  
318 connectivity revealed widespread decreases and localized increases within the frontal and temporal  
319 cortical areas and several subcortical regions including the thalamus, cerebellum, and vermis.

320 Using a linear support vector machine validated by leave-one-out cross validation, we  
321 achieved a maximum classification accuracy of 78%. Our results show that structural connections  
322 across the frontal lobe, temporal lobe, supplemental motor area, and cerebellum were the most  
323 discriminative of mTBI (Figure 7; Table 3). Interestingly, our feature selection method revealed that  
324 the structural connection regions whose respective functional connections exhibited the largest  
325 differences between mTBI and control were the most predictive of mTBI. (Figure 4; Table 2). This  
326 suggests that changes in structural connectivity caused by mTBI may be identified by differences in  
327 functional connectivity.

### 328 **4.1 Comparison to Current Literature**

329 Although functional connectivity was increased in mTBI patients compared to control as  
330 demonstrated by qualitative inspection, the functional connections with the largest differences were  
331 decreased in mTBI. While past literature suggests that mTBI results in functional hyperconnectivity  
332 (Hayes, Bigler, and Verfaellie 2016), several studies have suggested that the direction of connectivity  
333 changes may be dependent on the phase of recovery from mTBI, and that functional  
334 hypoconnectivity is an early response to injury (Dall'Acqua et al. 2017; Zhu et al. 2015; Irajii et al.  
335 2015).

336 Conversely, we found that the largest differences in structural connectivity were positive,  
337 while most other differences in structural connectivity were negative. Increases in structural  
338 connectivity among a small subset of network connections has been attributed to the “rich-club”



Multimodal Classification of Mild Traumatic Brain Injury Reveals Local Coupling Between Structural and Functional Connectomes

339 hypothesis, whereby injury to tertiary nodes triggers a rerouting of neural architecture towards more  
340 central network hubs (Dall'Acqua et al. 2017; Heuvel and Sporns 2011)

341 (Mitra et al. 2016) Previous studies have analyzed unimodal neuroimaging datasets to  
342 discriminate mTBI from healthy control. A study that attempted classification on unimodal datasets  
343 to detect mTBI via structural connections was by (Mitra et al. 2016). The authors achieved a  
344 classification accuracy of 68%. In contrast, our method demonstrated that multimodal imaging  
345 increased classification accuracy up to 78%.

346 Previous studies have shown that classification analysis using multimodal datasets either  
347 decrease classification performance (Vergara et al., 2016), or cannot identify a specific set of network  
348 connections predictive of mTBI (Sinke et al, 2021). However, our approach demonstrates that DTI  
349 and fMRI can be combined to yield high classification performance. Specifically, we showed that  
350 group differences in functional connectivity could be used to identify structural features predictive of  
351 mTBI. Our high classification performance was enabled by our novel multimodal feature selection  
352 method, which reduced the number of structural connections for classification.

353 An important component of our feature selection method was the identification of group  
354 differences in functional connectivity. It is well known that mTBI affects resting state functional  
355 connectivity and has been reported frequently in past literature (Mayer et al. 2011) (Stevens et al.  
356 2012) (Palacios et al. 2017) (Iraji et al. 2015).

357 In comparison to fractional anisotropy (FA), we found that structural connectivity measured  
358 by tractography is more predictive of mTBI. Interestingly, this suggests that despite mTBI being  
359 normally associated with the cellular-level damage, metrics that capture fine-grain differences in  
360 white matter integrity are less predictive of mTBI. Instead, coarse-grained diffusion tractography  
361 captured network-level reorganization in patients with mTBI. This suggests that network-level  
362 analysis may yield more sensitive biomarkers to mTBI in comparison to diffusion tensor metrics.  
363 Additionally, our corroborate past results from Iraji et al who showed that traumatic brain injury  
364 results in connectome-scale reorganization (Iraji et al. 2016b). Finally, FA can be distorted by edema  
365 or other microenvironmental changes that are unrelated to white matter structural integrity.

## 366 4.2 Structural and Functional Connectivity Alterations in mTBI

367 Our multimodal approach using both DTI and rs-fMRI allowed us to assess the relationship  
368 between alterations in structural and functional connectivity in mTBI (Hayes, 2016). Specifically, we  
369 found that network connections with altered functional connectivity also exhibit structural  
370 connectivity that is predictive of mTBI. Relationships between structural and functional connectivity  
371 have been identified in past literature and are termed “structure-function coupling” (Honey et al.  
372 2009). In mTBI, disruption or “decoupling” between structural and functional connectomes has been  
373 associated with clinically relevant symptoms such as cognitive sensorimotor and behavioral  
374 impairments (Harris, Verley, Gutman, Thompson, et al., 2016; Sinke et al., 2021).

375 The literature has reported varying effects of mTBI on structural-functional coupling. Several  
376 studies have found positive correlations between changes in structural and functional connectivity in  
377 mTBI (Palacios et al. 2013b) (Zhang et al. 2010) (Sharp et al. 2011). Other studies have either found  
378 that both structural and functional connectivity is decreased or that an inverse relationship between  
379 the two connectomes occurs in mTBI. Wang et al found a negative correlation between structural and  
380 functional connectivity in mTBI (Wang et al. 2021) Rajesh et al found mTBI was associated with

## Multimodal Classification of Mild Traumatic Brain Injury Reveals Local Coupling Between Structural and Functional Connectomes

381 functional hypo-activation across the default mode network, which corroborates the decrease in  
382 functional connectivity among the most predictive connections in our study (Rajesh et al. 2017).  
383 Tang et al also identified an inverse relationship between fractional anisotropy and default mode  
384 network functional connectivity (Tang et al. 2012). Other studies have either found that both  
385 structural and functional connectivity is decreased or that mTBI exhibits an inverse relationship  
386 between the two connectomes. (Wang et al. 2021)(Rajesh et al. 2017) (Tang et al. 2012)

387 In contrast, our results indicate a more local relationship between structural and functional  
388 connectivity, whereby physical injury to structural connections between the frontal lobe and temporal  
389 lobes results in altered functional connectivity among those same connections. Our findings have  
390 been corroborated by Irajii et al, who identified the same “landmark” structural connections that also  
391 exhibited functional alterations (Irajii et al. 2016b). Other studies have also reported local differences  
392 in functional and structural connectivity in mild TBI (Harris, 2016) (Sharp, 2011).

393 We found that structural connections across the frontal and temporal lobes were predictive of  
394 mTBI. Interestingly, both the temporal and frontal lobes are particularly vulnerable to injury due to  
395 its sensitivity to inertial forces, which has been demonstrated in numerous human and animal studies  
396 (Bigler 2007; Kampfl et al. 1998; Kotapka et al. 1991; Smith et al. 1997; Cullen et al. 2016)

397 A possible mechanism behind the alterations to structure-function coupling after mTBI has  
398 been proposed by Kuceyeski et al in 2019. The authors suggest that increased structural and  
399 functional network changes are a compensatory response to mTBI (Kuceyeski et al. 2019). Future  
400 studies can explore the mechanisms underlying network reorganization after mild TBI.

## 401 **5 Limitations and Future Directions**

402 Our study has several limitations. First, subjects with TBI can suffer injury to any nonspecific  
403 brain area. This heterogeneity presents a challenge in generalizing our results to the larger patient  
404 population. Related to this issue is the small sample size present in our study. Evidence has shown  
405 that performance of machine learning algorithms scales with sample size in neuroimaging studies  
406 (Marc-Andre et al. 2020). A separate limitation is that the age of our mTBI cohort is older than the  
407 control group. Additionally, our study did not take into consideration the heterogeneity of the timing  
408 of neuroimaging relative to the timing of injury among our subjects. The phase of recovery after the  
409 brain injury has been shown to have an impact on changes in brain connectivity (Dall’Acqua et al.  
410 2017). In order to overcome these limitations, longitudinal and prospective studies are needed to gain  
411 a better understanding of how early connectivity changes due to mTBI result in chronic cognitive and  
412 behavioral deficits. Better study design may reveal more sensitive and specific biomarkers that can be  
413 used in tandem with clinical evaluation to enable early diagnosis. In the future, longitudinal studies  
414 are needed to gain a better understanding of how early connectivity changes due to mTBI result in  
415 chronic cognitive and behavioral deficits. Prospective studies may reveal specific biomarkers that can  
416 be used in tandem with clinical evaluation to enable early diagnosis.

## 417 **6 Conclusion**

418 In summary, our machine-learning approach revealed changes in brain networks associated  
419 with mild TBI. Through a novel feature selection method, we demonstrated that multimodal imaging  
420 of both structural and functional connectomes can serve as a potential biomarker for mild TBI. Our  
421 results show that differences in functional connectivity are reflected by corresponding changes in

This is made available under a [CC-BY 4.0 International license](https://creativecommons.org/licenses/by/4.0/).  
**Multimodal Classification of Mild Traumatic Brain Injury Reveals Local Coupling Between Structural and Functional Connectomes**

422 structural connectivity. Further, our results suggest that mild TBI affects the relationship between  
423 structural and functional connectivity.

## 424 **7 Conflict of Interest**

425 *The authors declare that the research was conducted in the absence of any commercial or financial*  
426 *relationships that could be construed as a potential conflict of interest.*

## 427 **8 Author Contributions**

428 Conceptualization, A.P. and H.S.; methodology, A.P., H.S., K.H., and B.J.B.; image processing:  
429 K.H., B.J.B., D.M., R.D., P.H., T.P., A.P., and T.S.; software, A.P. and K.H.; formal analysis, A.P.;  
430 investigation, A.P., T.S., H.S., C.L., and B.B.; administrative support and resources, H.S., C.L., E.G.,  
431 C.T. and T.Q.; data curation, C.L., D.V., E.G., T.Q., and R.R.; writing—original draft preparation,  
432 A.P., T.S., K.H. and C.T.; writing—review and editing, A.P., T.S., P.K., C.L., D.V., B. Biswal, and  
433 H.S.; visualization, C.T. and A.P.; supervision, H.S. and B. Biswal.

## 434 **9 Funding**

435 Both H.S. and B. Biswal are supported by a grant awarded by the US Dept. of Defense,  
436 Congressional Directed Medical Research Program (CDMRP), W81XWH-18-1-0655.

## 437 **10 Acknowledgments**

438 The authors would like to acknowledge the support from Department of Neurosurgery and  
439 Department of Radiology at Louisiana State University Health Sciences Center in Shreveport, LA.

## 440 **11 Data Availability Statement**

441 Data and code for this study will be made available upon request.

## 442 **12 References**

443 “Andersson 2007a.” n.d. <https://www.fmrib.ox.ac.uk/datasets/techrep/tr07ja1/tr07ja1.pdf>.

444 “Andersson 2007b.” n.d. <https://www.fmrib.ox.ac.uk/datasets/techrep/tr07ja2/tr07ja2.pdf>.

445 Andriy, Fedorov, Beichel Reinhard, Kalpathy-Cramer Jayashree, Finet Julien, Fillion-Robin Jean-  
446 Christophe, Pujol Sonia, Bauer Christian, et al. 2012. “3D Slicer as an Image Computing Platform  
447 for the Quantitative Imaging Network.” *Magnetic Resonance Imaging* 30 (9): 1323–41.  
448 doi:10.1016/j.mri.2012.05.001.

449 Biswal, Bharat, F. Zerrin Yetkin, Victor M. Haughton, and James S. Hyde. 1995. “Functional  
450 Connectivity in the Motor Cortex of Resting Human Brain Using Echo-planar Mri.” *Magnetic*  
451 *Resonance in Medicine* 34 (4): 537–41. doi:10.1002/mrm.1910340409.

452 Chu, Shu-Hsien, Keshab K. Parhi, and Christophe Lenglet. 2018. “Function-Specific and Enhanced  
453 Brain Structural Connectivity Mapping via Joint Modeling of Diffusion and Functional MRI.”  
454 *Scientific Reports* 8 (1): 4741. doi:10.1038/s41598-018-23051-9.

It is made available under a [CC-BY 4.0 International license](https://creativecommons.org/licenses/by/4.0/).  
**Multimodal Classification of Mild Traumatic Brain Injury Reveals Local Coupling Between Structural and Functional Connectomes**

- 455 Craddock, R Cameron, Saad Jbabdi, Chao-Gan Yan, Joshua T Vogelstein, F Xavier Castellanos,  
456 Adriana Di Martino, Clare Kelly, Keith Heberlein, Stan Colcombe, and Michael P Milham. 2013.  
457 “Imaging Human Connectomes at the Macroscale.” *Nature Methods* 10 (6): 524–39.  
458 doi:10.1038/nmeth.2482.
- 459 Dall’Acqua, Patrizia, Sönke Johannes, Ladislav Mica, Hans-Peter Simmen, Richard Glaab, Javier  
460 Fandino, Markus Schwendinger, et al. 2017. “Functional and Structural Network Recovery after  
461 Mild Traumatic Brain Injury: A 1-Year Longitudinal Study.” *Frontiers in Human Neuroscience*  
462 11: 280. doi:10.3389/fnhum.2017.00280.
- 463 Friston, K. 2007. “Statistical Parametric Mapping.” *Part 1: Introduction*, no. Mag Res Med391998:  
464 10–31. doi:10.1016/b978-012372560-8/50002-4.
- 465 Gramfort, Alexandre, Alexis Thual, Bertrand Thirion, Elizabeth DuPre, Gael Varoquaux, Hao-Ting  
466 Wang, Jerome Dockes, et al. 2014. *Nilearn: Statistics for NeuroImaging in Python*.  
467 <https://nilearn.github.io/>.
- 468 Harris, N.G., D.R. Verley, B.A. Gutman, and R.L. Sutton. 2016. “Bi-Directional Changes in  
469 Fractional Anisotropy after Experiment TBI: Disorganization and Reorganization?” *NeuroImage*  
470 133: 129–43. doi:10.1016/j.neuroimage.2016.03.012.
- 471 Harris, N.G., D.R. Verley, B.A. Gutman, P.M. Thompson, H.J. Yeh, and J.A. Brown. 2016.  
472 “Disconnection and Hyper-Connectivity Underlie Reorganization after TBI: A Rodent Functional  
473 Connectomic Analysis.” *Experimental Neurology* 277: 124–38.  
474 doi:10.1016/j.expneurol.2015.12.020.
- 475 Hayes, Jasmeet P., Erin D. Bigler, and Mieke Verfaellie. 2016. “Traumatic Brain Injury as a Disorder  
476 of Brain Connectivity.” *Journal of the International Neuropsychological Society* 22 (2): 120–37.  
477 doi:10.1017/s1355617715000740.
- 478 Heuvel, M P van den, and O Sporns. 2011. “Rich-Club Organization of the Human Connectome.”  
479 *Journal of Neuroscience* 31 (44): 15775–86. doi:10.1523/jneurosci.3539-11.2011.
- 480 Hu, Cheng, Wang Yang, Sheng Jinhua, Sporns Olaf, Kronenberger G. William, Mathews P. Vincent,  
481 Hummer A. Tom, and Saykin J. Andrew. 2012. “Optimization of Seed Density in DTI  
482 Tractography for Structural Networks.” *Journal of Neuroscience Methods* 203 (1): 264–72.  
483 doi:10.1016/j.jneumeth.2011.09.021.
- 484 Iraj, Armin, Randall R. Benson, Robert D. Welch, Brian J. O’Neil, John L. Woodard, Syed Imran  
485 Ayaz, Andrew Kulek, et al. 2015. “Resting State Functional Connectivity in Mild Traumatic Brain  
486 Injury at the Acute Stage: Independent Component and Seed-Based Analyses.” *Journal of*  
487 *Neurotrauma* 32 (14): 1031–45. doi:10.1089/neu.2014.3610.
- 488 Iraj, Armin, Hanbo Chen, Natalie Wiseman, Tuo Zhang, Robert Welch, Brian O’Neil, Andrew  
489 Kulek, et al. 2016a. “Connectome-Scale Assessment of Structural and Functional Connectivity in  
490 Mild Traumatic Brain Injury at the Acute Stage.” *NeuroImage : Clinical* 12: 100–115.  
491 doi:10.1016/j.nicl.2016.06.012.

Multimodal Classification of Mild Traumatic Brain Injury Reveals Local Coupling Between Structural and Functional Connectomes

- 492 ———. 2016b. “Connectome-Scale Assessment of Structural and Functional Connectivity in Mild  
493 Traumatic Brain Injury at the Acute Stage.” *NeuroImage : Clinical* 12: 100–115.  
494 doi:10.1016/j.nicl.2016.06.012.
- 495 Jones, Eric, Travis Oliphant, and Pearu Peterson. 2001. *SciPy: Open Source Scientific Tools for*  
496 *Python*. <http://www.scipy.org/>.
- 497 Kuceyeski, Amy F., Keith W. Jamison, Julia P. Owen, Ashish Raj, and Pratik Mukherjee. 2019.  
498 “Longitudinal Increases in Structural Connectome Segregation and Functional Connectome  
499 Integration Are Associated with Better Recovery after Mild TBI.” *Human Brain Mapping* 40 (15):  
500 4441–56. doi:10.1002/hbm.24713.
- 501 Lui, Yvonne W., Yuanyi Xue, Damon Kenul, Yulin Ge, Robert I. Grossman, and Yao Wang. 2014.  
502 “Classification Algorithms Using Multiple MRI Features in Mild Traumatic Brain Injury.”  
503 *Neurology* 83 (14): 1235–40. doi:10.1212/wnl.0000000000000834.
- 504 Marc-Andre, Schulz, Yeo Thomas B. T., Vogelstein T. Joshua, Mourao-Miranada Janaina, Kather N.  
505 Jakob, Kording Konrad, Richards Blake, and Bzdok Danilo. 2020. “Different Scaling of Linear  
506 Models and Deep Learning in UKBiobank Brain Images versus Machine-Learning Datasets.”  
507 *Nature Communications* 11 (1): 4238. doi:10.1038/s41467-020-18037-z.
- 508 Mayer, Andrew R., Maggie V. Mannell, Josef Ling, Charles Gasparovic, and Ronald A. Yeo. 2011.  
509 “Functional Connectivity in Mild Traumatic Brain Injury.” *Human Brain Mapping* 32 (11): 1825–  
510 35. doi:10.1002/hbm.21151.
- 511 Mckee, Ann C., and Daniel H. Daneshvar. 2015. “Chapter 4 The Neuropathology of Traumatic Brain  
512 Injury.” *Handbook of Clinical Neurology* 127: 45–66. doi:10.1016/b978-0-444-52892-6.00004-0.
- 513 Min, Liu, Chen Zhang, Beaulieu Christian, and Gross W. Donald. 2014. “Disrupted Anatomic White  
514 Matter Network in Left Mesial Temporal Lobe Epilepsy.” *Epilepsia* 55 (5): 674–82.  
515 doi:10.1111/epi.12581.
- 516 Mitra, Jhimli, Kai-kai Shen, Soumya Ghose, Pierrick Bourgeat, Jurgen Fripp, Olivier Salvado,  
517 Kerstin Pannek, D. Jamie Taylor, Jane L. Mathias, and Stephen Rose. 2016. “Statistical Machine  
518 Learning to Identify Traumatic Brain Injury (TBI) from Structural Disconnections of White  
519 Matter Networks.” *NeuroImage* 129: 247–59. doi:10.1016/j.neuroimage.2016.01.056.
- 520 Ni, Shu, Liu Yaou, Li Kuncheng, Duan Yunyun, Wang Jun, Yu Chunshui, Dong Huiqing, Ye Jing,  
521 and He Yong. 2011. “Diffusion Tensor Tractography Reveals Disrupted Topological Efficiency in  
522 White Matter Structural Networks in Multiple Sclerosis.” *Cerebral Cortex (New York, N.Y.: 1991)*  
523 21 (11): 2565–77. doi:10.1093/cercor/bhr039.
- 524 Palacios, Eva M., Roser Sala-Llonch, Carme Junque, Teresa Roig, Jose M. Tormos, Nuria Bargallo,  
525 and Pere Vendrell. 2013a. “Resting-State Functional Magnetic Resonance Imaging Activity and  
526 Connectivity and Cognitive Outcome in Traumatic Brain Injury.” *JAMA Neurology* 70 (7): 845–  
527 51. doi:10.1001/jamaneurol.2013.38.

It is made available under a [CC-BY 4.0 International license](https://creativecommons.org/licenses/by/4.0/).  
**Multimodal Classification of Mild Traumatic Brain Injury Reveals Local Coupling Between Structural and Functional Connectomes**

- 528 ———. 2013b. “Resting-State Functional Magnetic Resonance Imaging Activity and Connectivity  
529 and Cognitive Outcome in Traumatic Brain Injury.” *JAMA Neurology* 70 (7): 845–51.  
530 doi:10.1001/jamaneurol.2013.38.
- 531 Palacios, Eva M., Esther L. Yuh, Yi-Shin Chang, John K. Yue, David M. Schnyer, David O.  
532 Okonkwo, Alex B. Valadka, et al. 2017. “Resting-State Functional Connectivity Alterations  
533 Associated with Six-Month Outcomes in Mild Traumatic Brain Injury.” *Journal of Neurotrauma*  
534 34 (8): 1546–57. doi:10.1089/neu.2016.4752.
- 535 Pedregosa, Fabian, Varoquaux Gaël, Gramfort Alexandre, Michel Vincent, Thirion Bertrand, Grisel  
536 Olivier, Blondel Mathieu, Prettenhofer Peter, Weiss Ron, and Dubourg Vincent. 2011. “Scikit-  
537 Learn: Machine Learning in Python.” *The Journal of Machine Learning Research* 12: 2825–30.
- 538 Puig, Josep, Michael J. Ellis, Jennifer Kornelsen, Teresa D. Figley, Chase R. Figley, Pepus Daunis-i-  
539 Estadella, W. Alan C. Mutch, and Marco Essig. 2020. “Magnetic Resonance Imaging Biomarkers  
540 of Brain Connectivity in Predicting Outcome after Mild Traumatic Brain Injury: A Systematic  
541 Review.” *Journal of Neurotrauma* 37 (16): 1761–76. doi:10.1089/neu.2019.6623.
- 542 Rajesh, Aishwarya, Gillian E. Cooke, Jim M. Monti, Andrew Jahn, Ana M. Daugherty, Neal J.  
543 Cohen, and Arthur F. Kramer. 2017. “Differences in Brain Architecture in Remote Mild  
544 Traumatic Brain Injury.” *Journal of Neurotrauma* 34 (23): 3280–87. doi:10.1089/neu.2017.5047.
- 545 Rossum, Guido Van, and Fred L. Drake. 1995. *Python 3 Reference Manual*. CreateSpace.
- 546 Rueckert, D., L.I. Sonoda, C. Hayes, D.L.G. Hill, M.O. Leach, and D.J. Hawkes. 1999. “Nonrigid  
547 Registration Using Free-Form Deformations: Application to Breast MR Images.” *IEEE*  
548 *Transactions on Medical Imaging* 18 (8): 712–21. doi:10.1109/42.796284.
- 549 Shalhaf, Ahmad, Reza Shalhaf, Mohsen Saffar, and Jamie Sleight. 2020. “Monitoring the Level of  
550 Hypnosis Using a Hierarchical SVM System.” *Journal of Clinical Monitoring and Computing* 34  
551 (2): 331–38. doi:10.1007/s10877-019-00311-1.
- 552 Sharp, David J., Christian F. Beckmann, Richard Greenwood, Kirsi M. Kinnunen, Valerie Bonnelle,  
553 Xavier De Boissezon, Jane H. Powell, Serena J. Counsell, Maneesh C. Patel, and Robert Leech.  
554 2011. “Default Mode Network Functional and Structural Connectivity after Traumatic Brain  
555 Injury.” *Brain* 134 (8): 2233–47. doi:10.1093/brain/awr175.
- 556 Shattuck, David W., Joshi A Anand, Haldar P Justin, Bhushan Chitresh, Choi Soyoung, Krause C  
557 Andrew, Wisnowski L Jessica, Toga W Arthur, and Leahy M Richard. 2013. “Software Tools for  
558 Anatomical ROI-Based Connectivity Analysis,” January, 1.
- 559 Shattuck, David W, and Richard M Leahy. 2002. “BrainSuite: An Automated Cortical Surface  
560 Identification Tool.” *Medical Image Analysis* 6 (2): 129–42. doi:10.1016/s1361-8415(02)00054-3.
- 561 Sinke, Michel R.T., Willem M. Otte, Anu E. Meerwaldt, Bart A. A. Franx, Mohamed H. M. Ali,  
562 Fazle Rakib, Annette van der Toorn, et al. 2021. “Imaging Markers for the Characterization of  
563 Gray and White Matter Changes from Acute to Chronic Stages after Experimental Traumatic  
564 Brain Injury.” *Journal of Neurotrauma* 38 (12): 1642–53. doi:10.1089/neu.2020.7151.

This is made available under a [CC-BY 4.0 International license](https://creativecommons.org/licenses/by/4.0/).  
**Multimodal Classification of Mild Traumatic Brain Injury Reveals Local Coupling Between Structural and Functional Connectomes**

- 565 Smith, Robert E., Jacques-Donald Tournier, Fernando Calamante, and Alan Connelly. 2012.  
566 “Anatomically-Constrained Tractography: Improved Diffusion MRI Streamlines Tractography  
567 through Effective Use of Anatomical Information.” *NeuroImage* 62 (3): 1924–38.  
568 doi:10.1016/j.neuroimage.2012.06.005.
- 569 Smith, Stephen M., Mark Jenkinson, Heidi Johansen-Berg, Daniel Rueckert, Thomas E. Nichols,  
570 Clare E. Mackay, Kate E. Watkins, et al. 2006. “Tract-Based Spatial Statistics: Voxelwise  
571 Analysis of Multi-Subject Diffusion Data.” *NeuroImage* 31 (4): 1487–1505.  
572 doi:10.1016/j.neuroimage.2006.02.024.
- 573 Smith, Stephen M., Mark Jenkinson, Mark W. Woolrich, Christian F. Beckmann, Timothy E.J.  
574 Behrens, Heidi Johansen-Berg, Peter R. Bannister, et al. 2004. “Advances in Functional and  
575 Structural MR Image Analysis and Implementation as FSL.” *NeuroImage* 23: S208–19.  
576 doi:10.1016/j.neuroimage.2004.07.051.
- 577 Stevens, Michael C., David Lovejoy, Jinsuh Kim, Howard Oakes, Inam Kureshi, and Suzanne T.  
578 Witt. 2012. “Multiple Resting State Network Functional Connectivity Abnormalities in Mild  
579 Traumatic Brain Injury.” *Brain Imaging and Behavior* 6 (2): 293–318. doi:10.1007/s11682-012-  
580 9157-4.
- 581 Tang, Cheuk, Emily Eaves, Kristen Dams-O’Connor, Lap Ho, Eric Leung, Edmund Wong, David  
582 Carpenter, Johnny Ng, Wayne Gordon, and Giulio Pasinetti. 2012. “Diffuse Disconnectivity in  
583 Traumatic Brain Injury: A Resting State fMRI and DTI Study.” *Translational Neuroscience* 3  
584 (1): 9–14. doi:10.2478/s13380-012-0003-3.
- 585 Vergara, Victor M., Andrew R. Mayer, Eswar Damaraju, Kent A. Kiehl, and Vince Calhoun. 2017.  
586 “Detection of Mild Traumatic Brain Injury by Machine Learning Classification Using Resting  
587 State Functional Network Connectivity and Fractional Anisotropy.” *Journal of Neurotrauma* 34  
588 (5): 1045–53. doi:10.1089/neu.2016.4526.
- 589 Wang, Shan, Shuoqi Gan, Xuefei Yang, Tianhui Li, Feng Xiong, Xiaoyan Jia, Yingxiang Sun, Jun  
590 Liu, Ming Zhang, and Lijun Bai. 2021. “Decoupling of Structural and Functional Connectivity in  
591 Hubs and Cognitive Impairment After Mild Traumatic Brain Injury.” *Brain Connectivity* 11 (9):  
592 745–58. doi:10.1089/brain.2020.0852.
- 593 Whitfield-Gabrieli, Susan, and Alfonso Nieto-Castanon. 2012. “Conn: A Functional Connectivity  
594 Toolbox for Correlated and Anticorrelated Brain Networks.” *Brain Connectivity* 2 (3): 125–41.  
595 doi:10.1089/brain.2012.0073.
- 596 Zhang, K., B. Johnson, D. Pennell, W. Ray, W. Sebastianelli, and S. Slobounov. 2010. “Are  
597 Functional Deficits in Concussed Individuals Consistent with White Matter Structural Alterations:  
598 Combined fMRI & DTI Study.” *Experimental Brain Research* 204 (1): 57–70.  
599 doi:10.1007/s00221-010-2294-3.
- 600 Zhu, David C., Tracey Covassin, Sally Nogle, Scarlett Doyle, Doozie Russell, Randolph L. Pearson,  
601 Jeffrey Monroe, Christine M. Liszewski, J. Kevin DeMarco, and David I. Kaufman. 2015. “A  
602 Potential Biomarker in Sports-Related Concussion: Brain Functional Connectivity Alteration of

It is made available under a [CC-BY 4.0 International license](#).

**Multimodal Classification of Mild Traumatic Brain Injury Reveals Local Coupling Between Structural and Functional Connectomes**

603 the Default-Mode Network Measured with Longitudinal Resting-State fMRI over Thirty Days.”  
604 *Journal of Neurotrauma* 32 (5): 327–41. doi:10.1089/neu.2014.3413.

605
